# Supplementary material for: Saliramophenol, an unprecedented natural t-butylphenol derivative from Salicornia ramosissima J. Woods
Source: Royal Society of Chemistry journal article supplement (doi:10.1039/c5ra10893d), 2015-01-01
Supplement: c5ra10893d1.pdf [file c5ra10893d1.pdf]

**Electronic supplementary Information for paper entitled:**

**Saliramophenol, an unprecedented natural *t*-butylphenol derivative from  
*Salicornia ramosissima* J. Woods**

V. M. S. Isca,<sup>a</sup> A. M. L. Seca,<sup>a,b</sup> D. C. G. A. Pinto,<sup>a\*</sup> H. Silva<sup>c</sup> and A. M. S. Silva<sup>a</sup>

<sup>a</sup>Department of Chemistry & QOPNA, University of Aveiro, 3810-193 Aveiro, Portugal

<sup>b</sup>DCTD, University of Azores, Rua Mãe de Deus, 9501-801 Ponta Delgada, Portugal

<sup>c</sup>Department of Biology, & CESAM, University of Aveiro, 3810-193 Aveiro, Portugal

## Figure Caption

Fig. S1:  $^1\text{H}$  NMR (500.13 MHz,  $\text{CDCl}_3$ ) spectrum of the compound **1**.

Fig. S2: Expansion of  $^1\text{H}$  NMR spectrum of the compound **1**.

Fig. S3:  $^{13}\text{C}$  NMR (75.13 MHz,  $\text{CDCl}_3$ ) spectrum of the compound **1**.

Fig. S4: Expansion of  $^{13}\text{C}$  NMR spectrum of the compound **1**.

Fig. S5: Other expansion of  $^{13}\text{C}$  NMR spectrum of the compound **1**.

Fig. S6: HSQC NMR spectrum of the compound **1**.

Fig. S7: Expansion of HSQC NMR spectrum of the compound **1**.

Fig. S8: Other expansion of HSQC NMR spectrum of the compound **1**.

Fig. S9: HMBC NMR spectrum of the compound **1**.

Fig. S10: Expansion of HMBC NMR spectrum of the compound **1**.

Fig. S11: Other expansion of HMBC NMR spectrum of the compound **1**.

Fig. S12: MS-ESI (+) spectrum of the compound **1**.

Fig. S13: MS-MS-ESI (+) spectrum of the peak  $m/z$  663 of the MS-ESI spectrum of the compound **1**.

Fig. S14: MS-MS-ESI (+) spectrum of the peak  $m/z$  685 of the MS-ESI spectrum of the compound **1**.

Fig. S15: HRMS spectrum of the compound **1**.

Fig. S16: FTIR spectrum of the compound **1**.

Fig. S17: Normalized UV-Vis spectrum of the compound **1** in DMSO

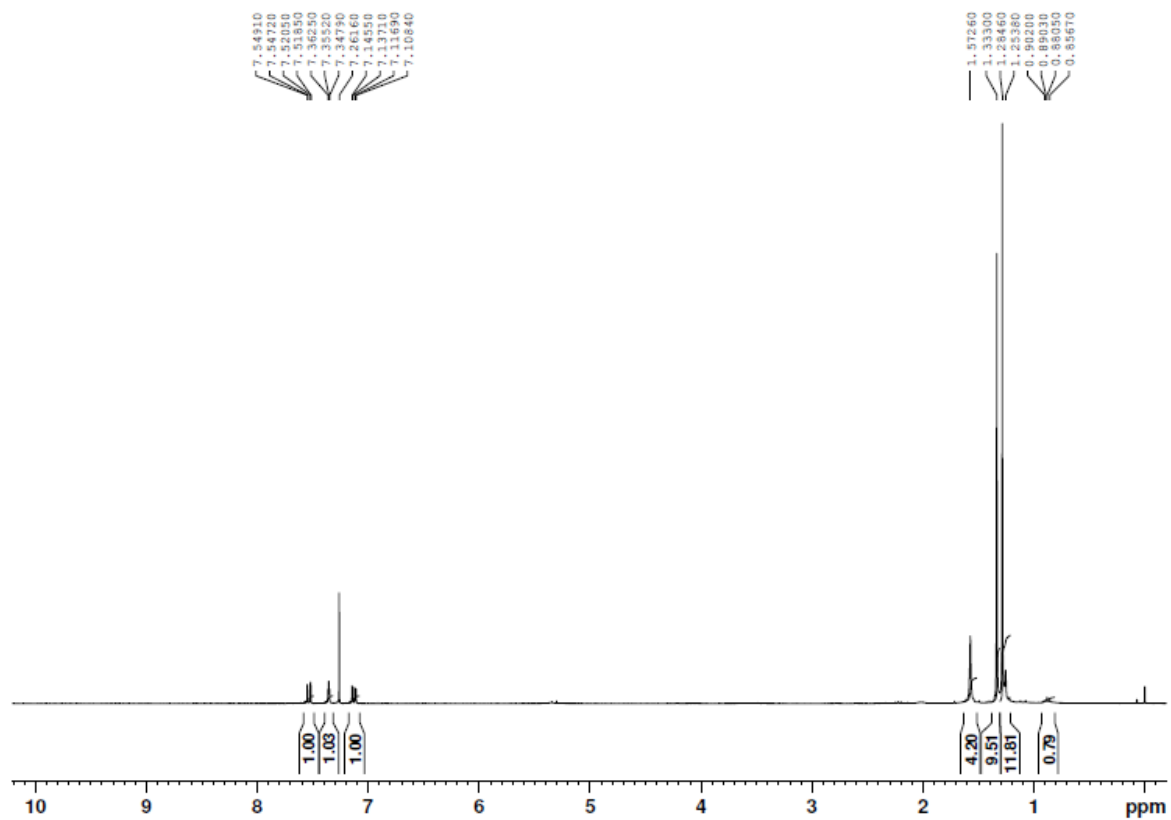

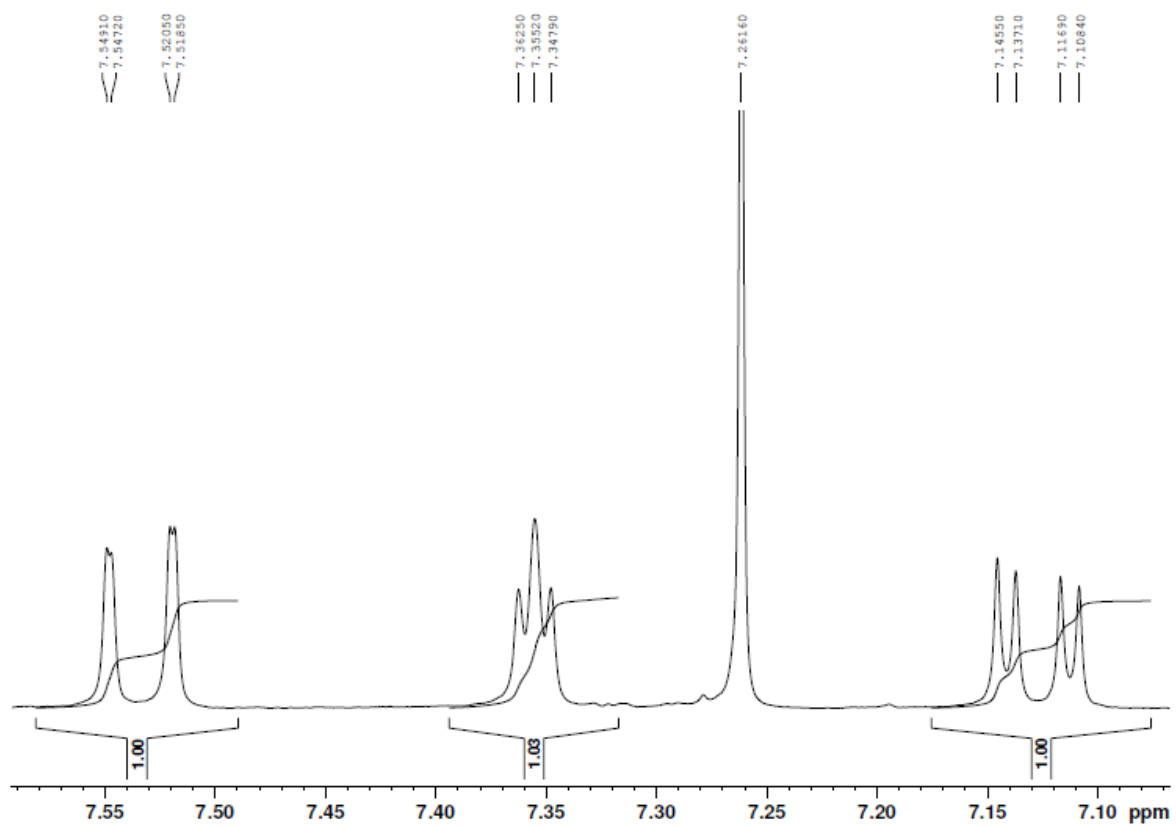

Fig. S2: Expansion of  $^1\text{H}$  NMR spectrum of the compound **1**.

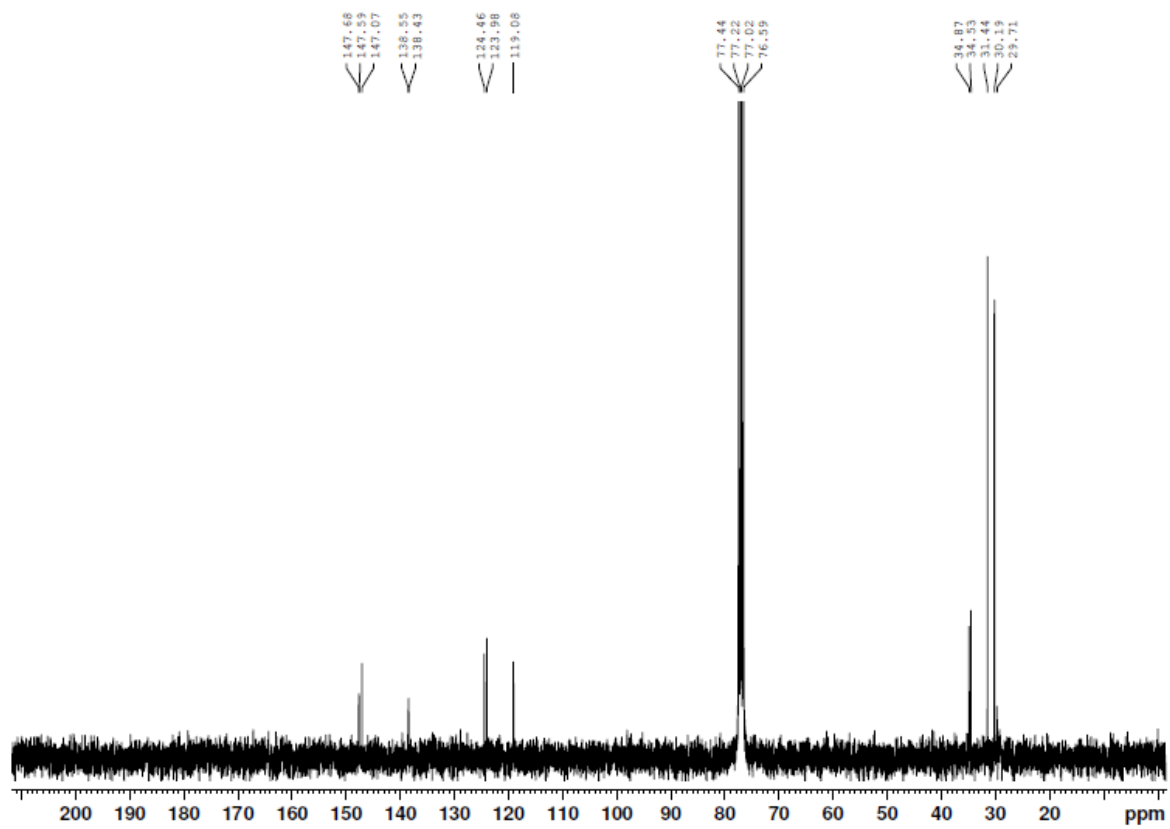

Fig. S3: <sup>13</sup>C NMR spectrum of the compound 1.

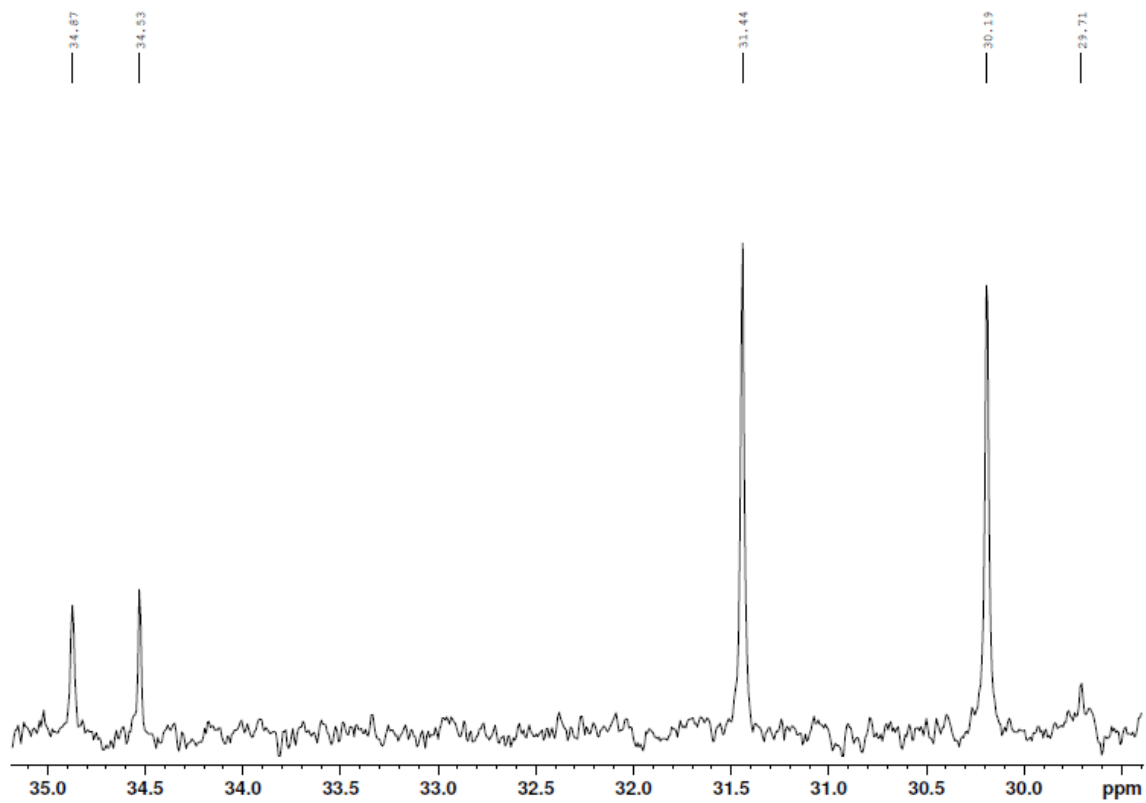

Fig. S4: Expansion of  $^{13}\text{C}$  NMR spectrum of the compound 1.

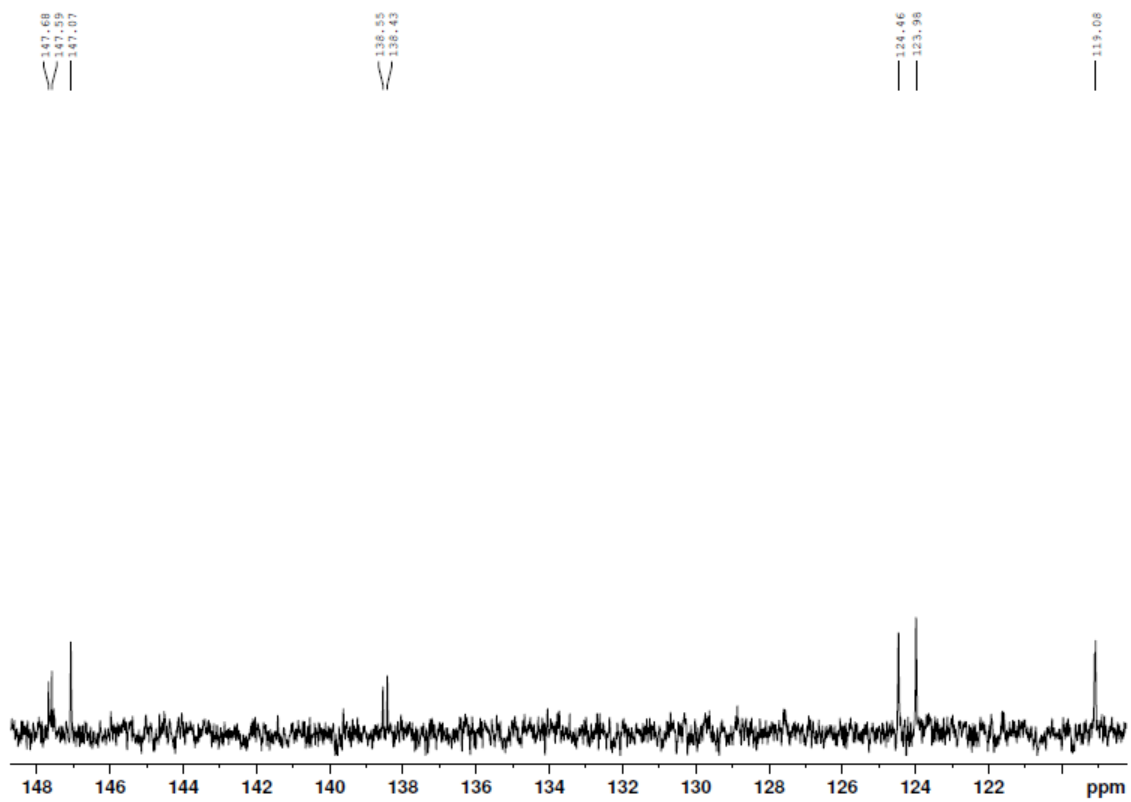

Fig. S5: Other expansion of  $^{13}\text{C}$  NMR spectrum of the compound 1.

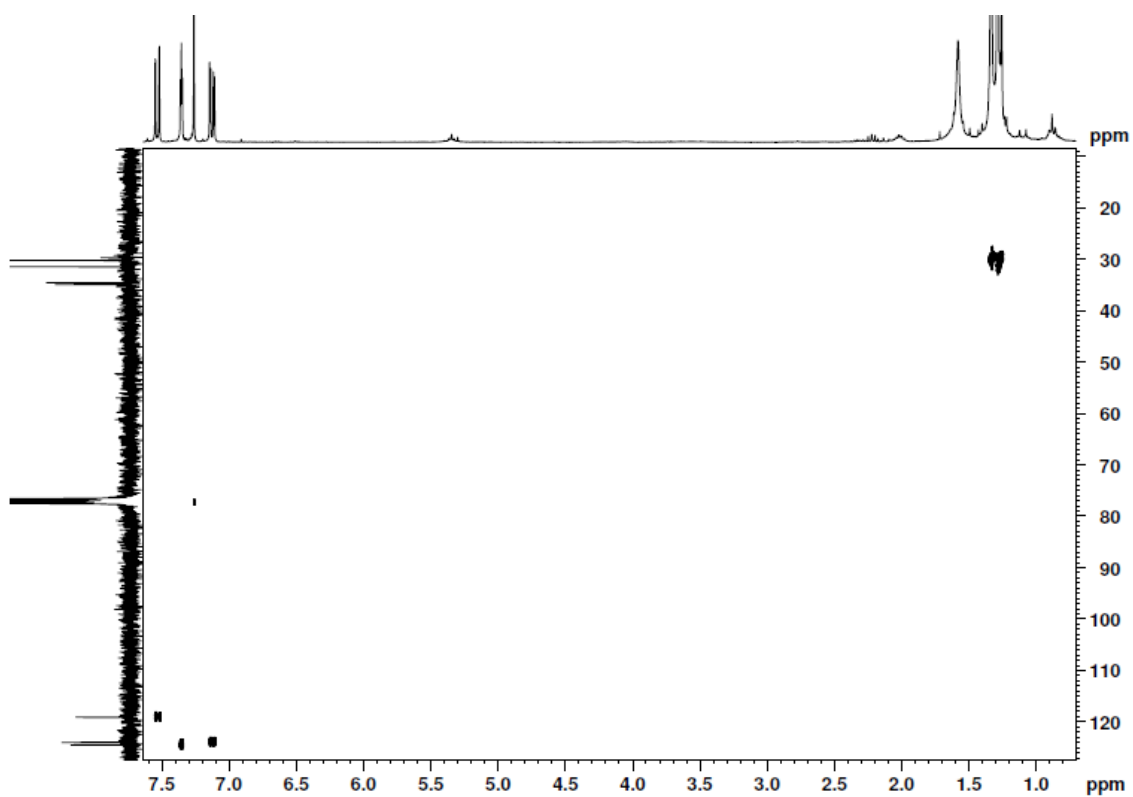

Fig. S6: HSQC NMR spectrum of the compound **1**.



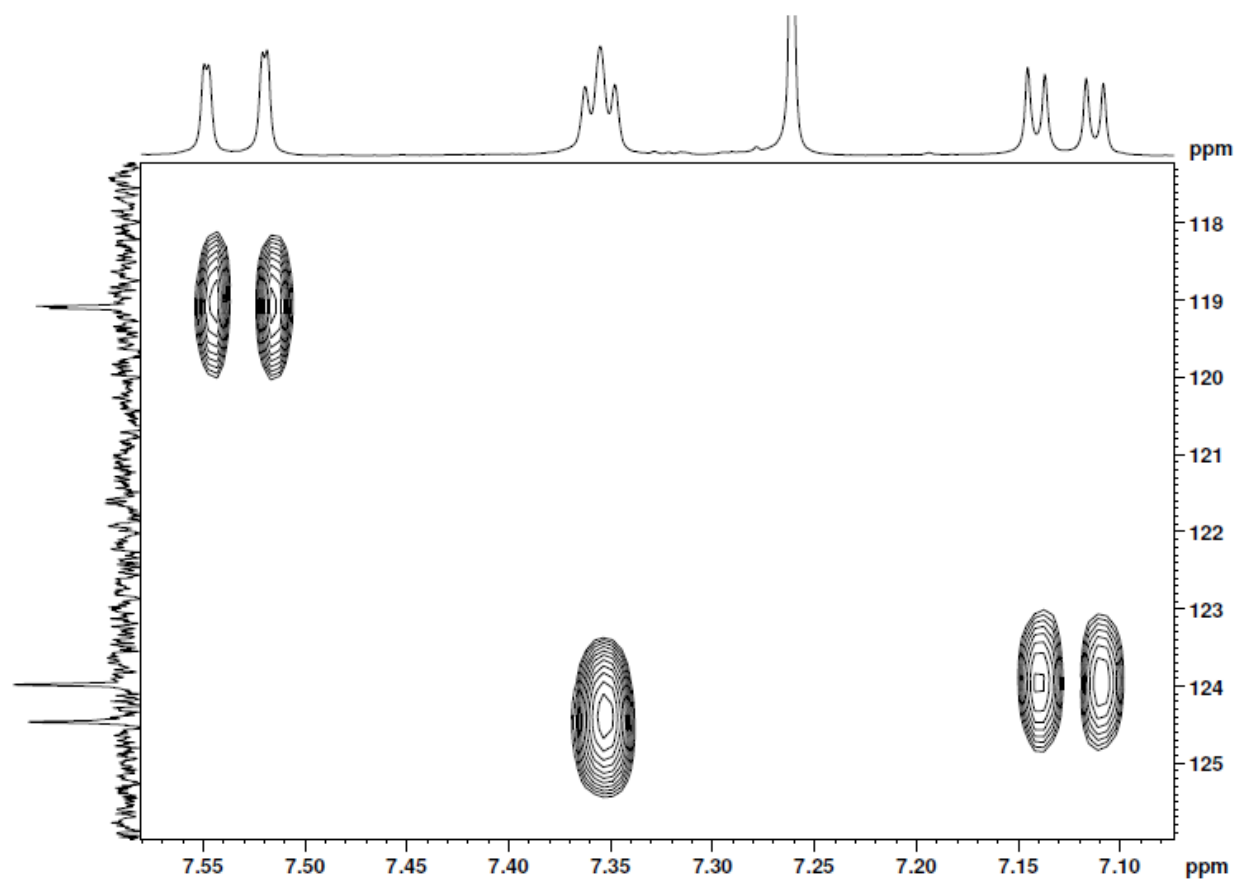

Fig. S7: Expansion of HSQC NMR spectrum of the compound **1**.

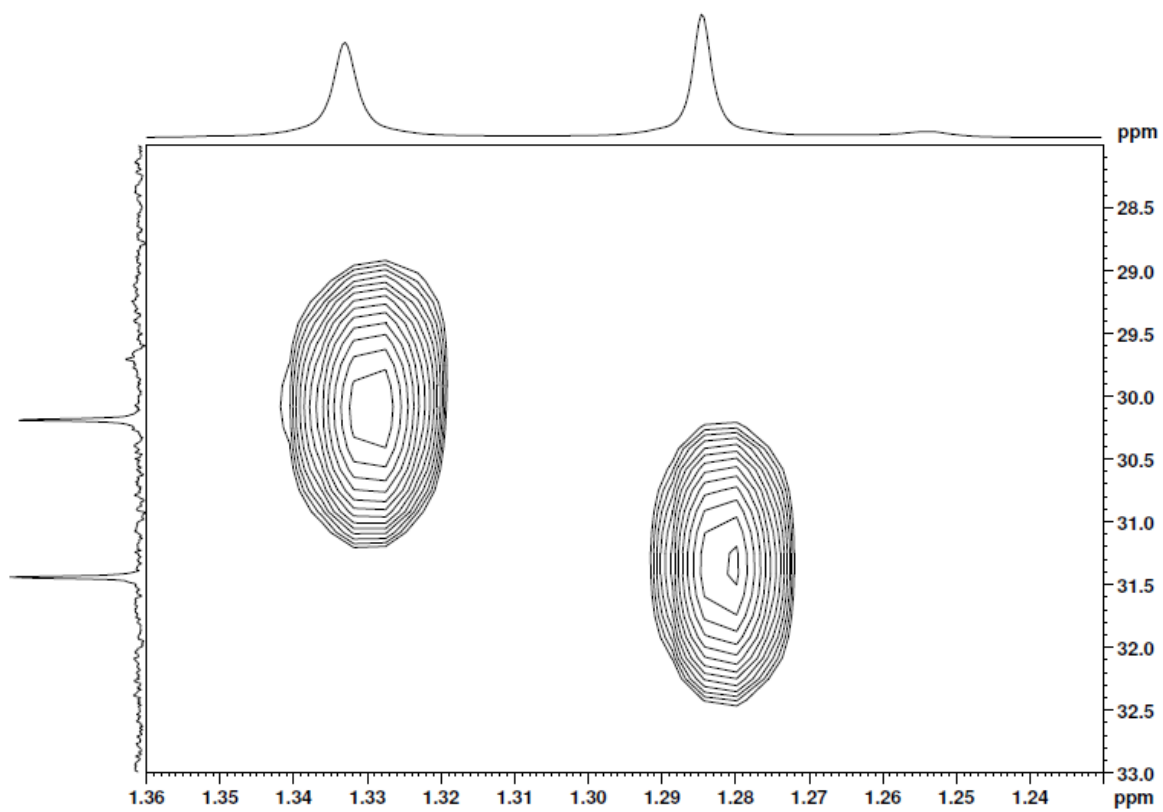

Fig. S8: Other expansion of HSQC NMR spectrum of the compound **1**.

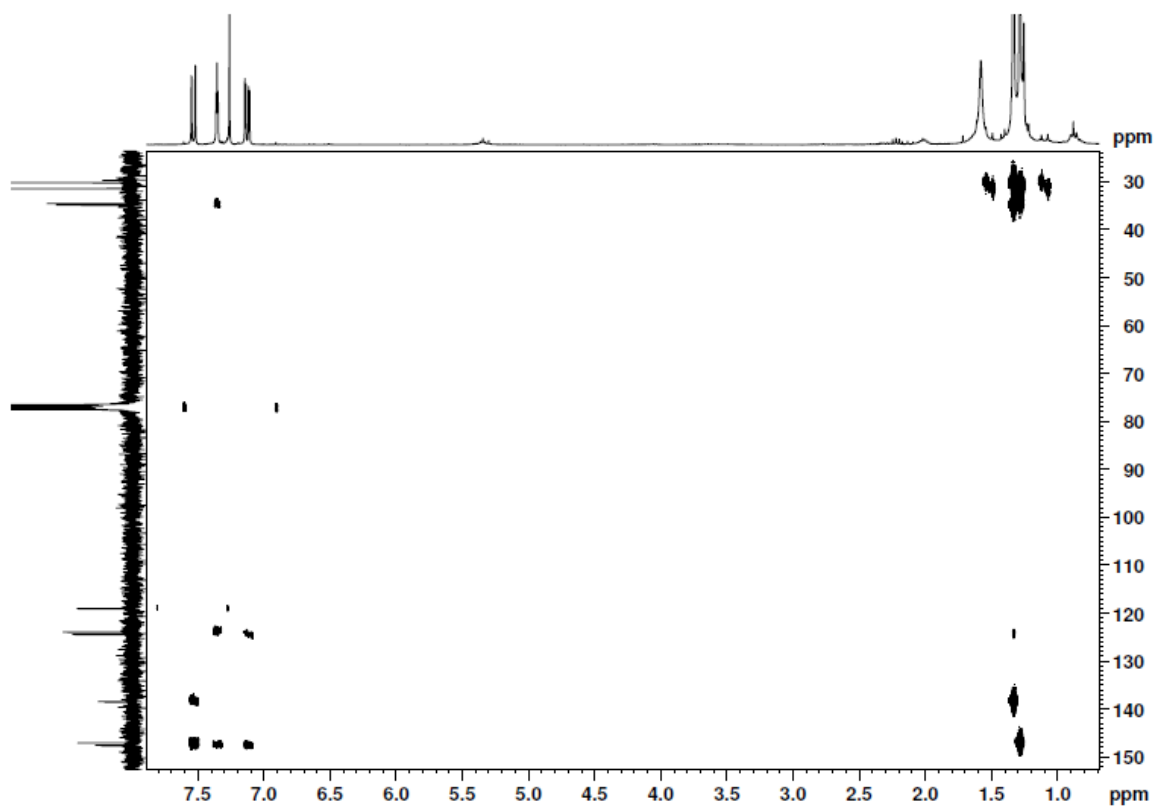

Fig. S9: HMBC NMR spectrum of the compound 1.

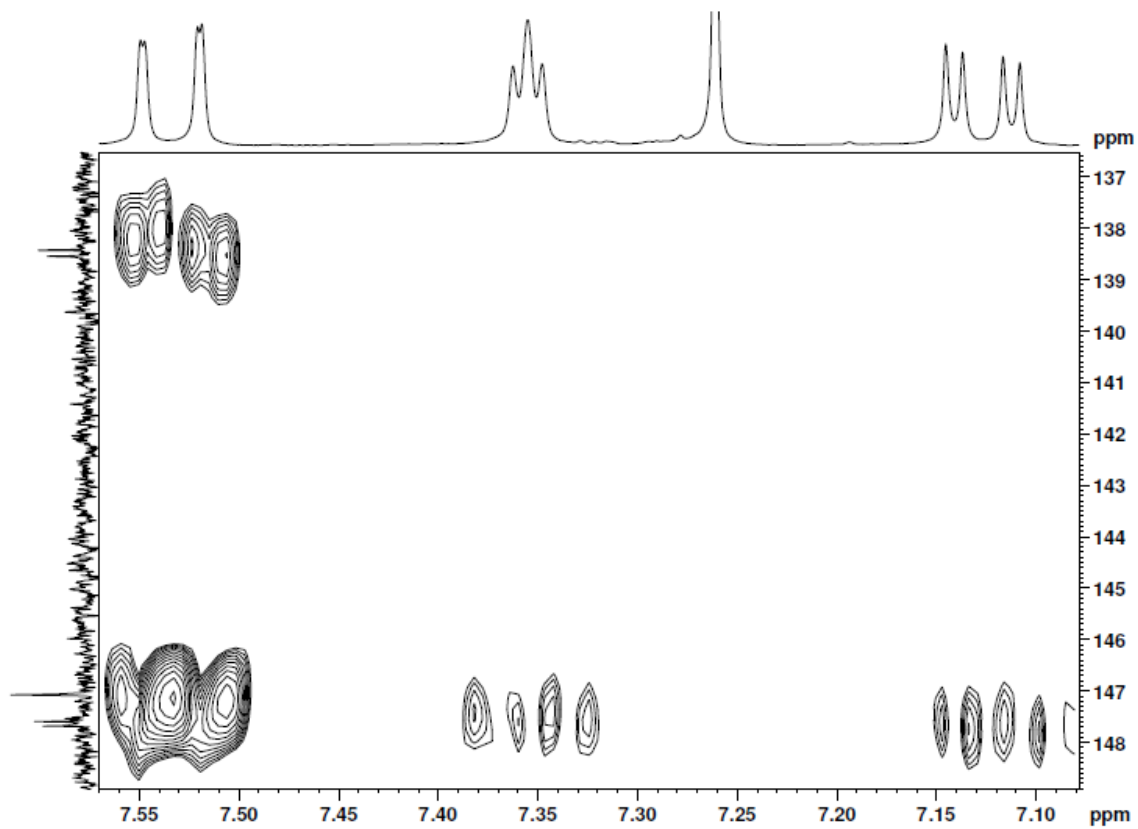

Fig. S10: Expansion of HMBC NMR spectrum of the compound **1**.

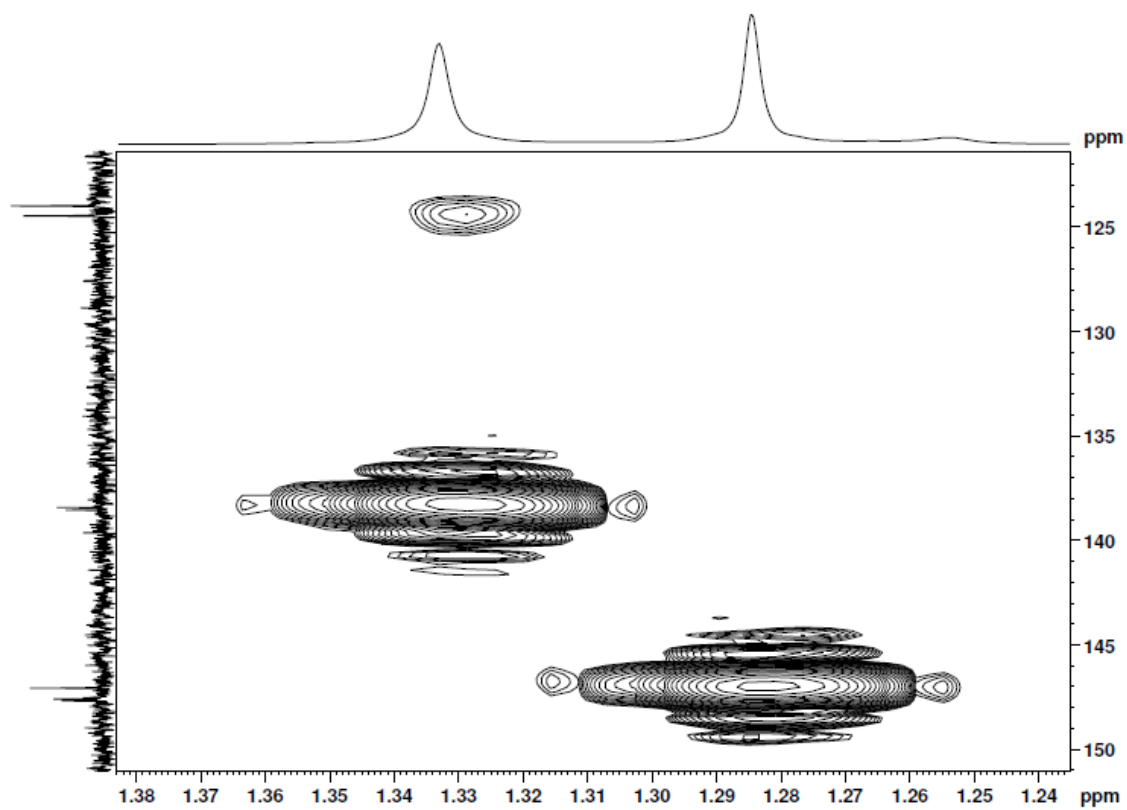

Fig. S11: Other expansion of HMBC NMR spectrum of the compound **1**.

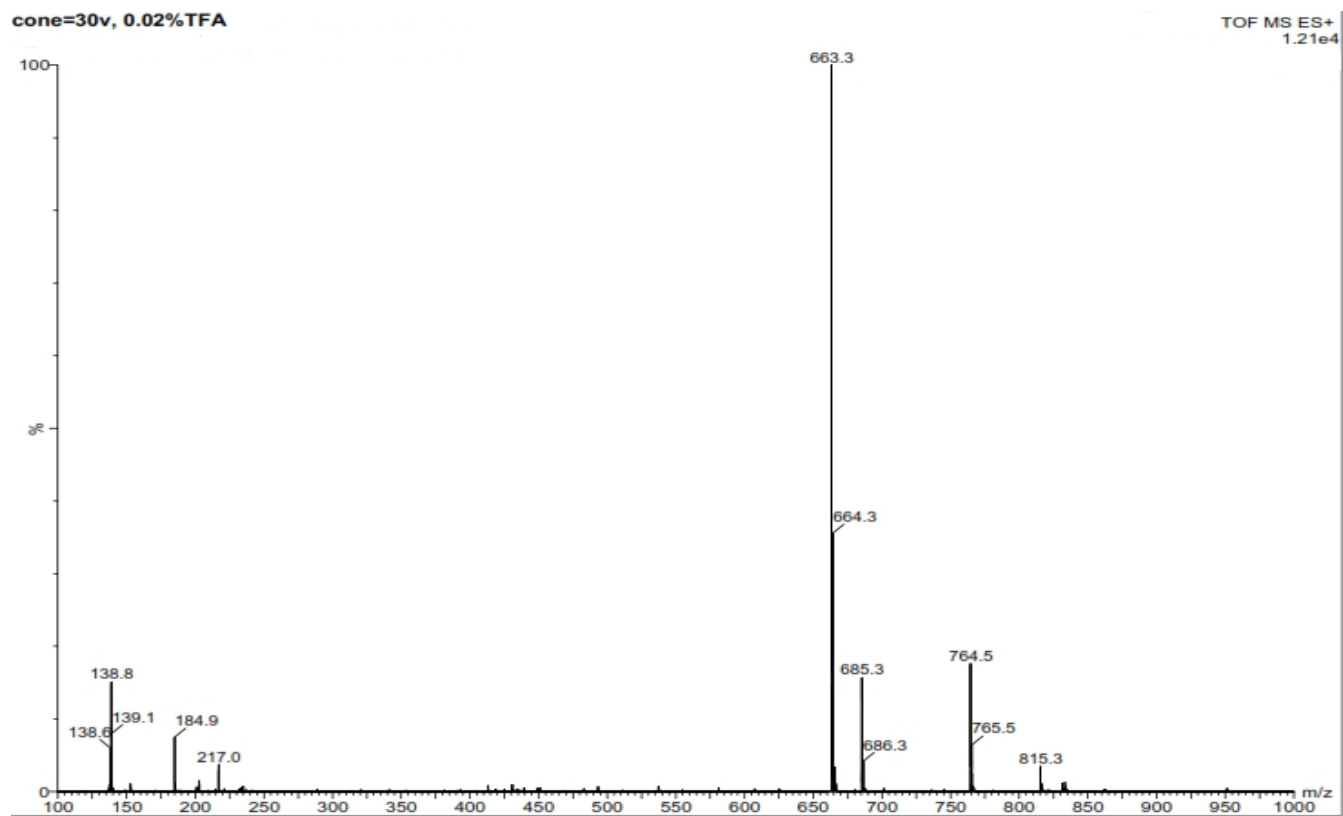

Fig. S12: MS-ESI (+) spectrum of the compound **1**.

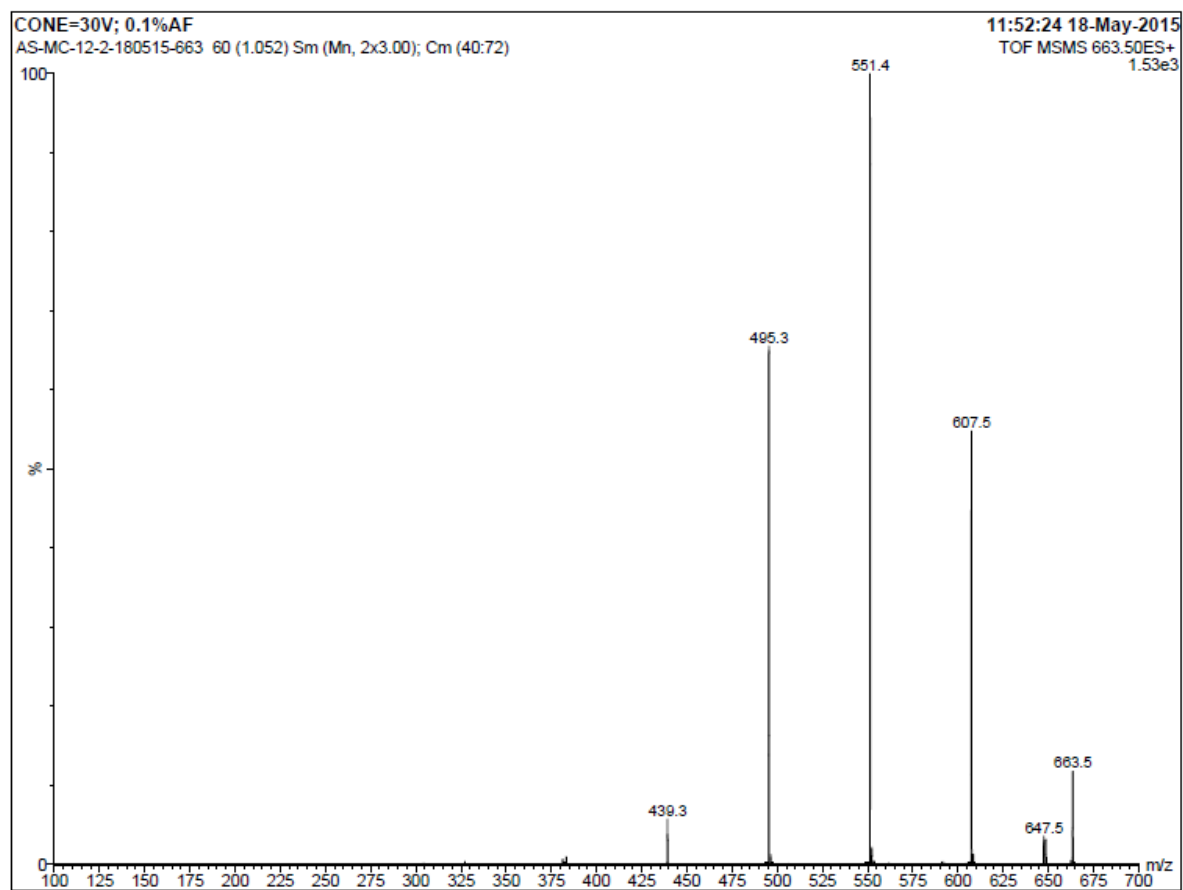

Fig. S13: MS-MS-ESI (+) spectrum of the peak  $m/z$  663 of the MS-ESI spectrum of the compound **1**.

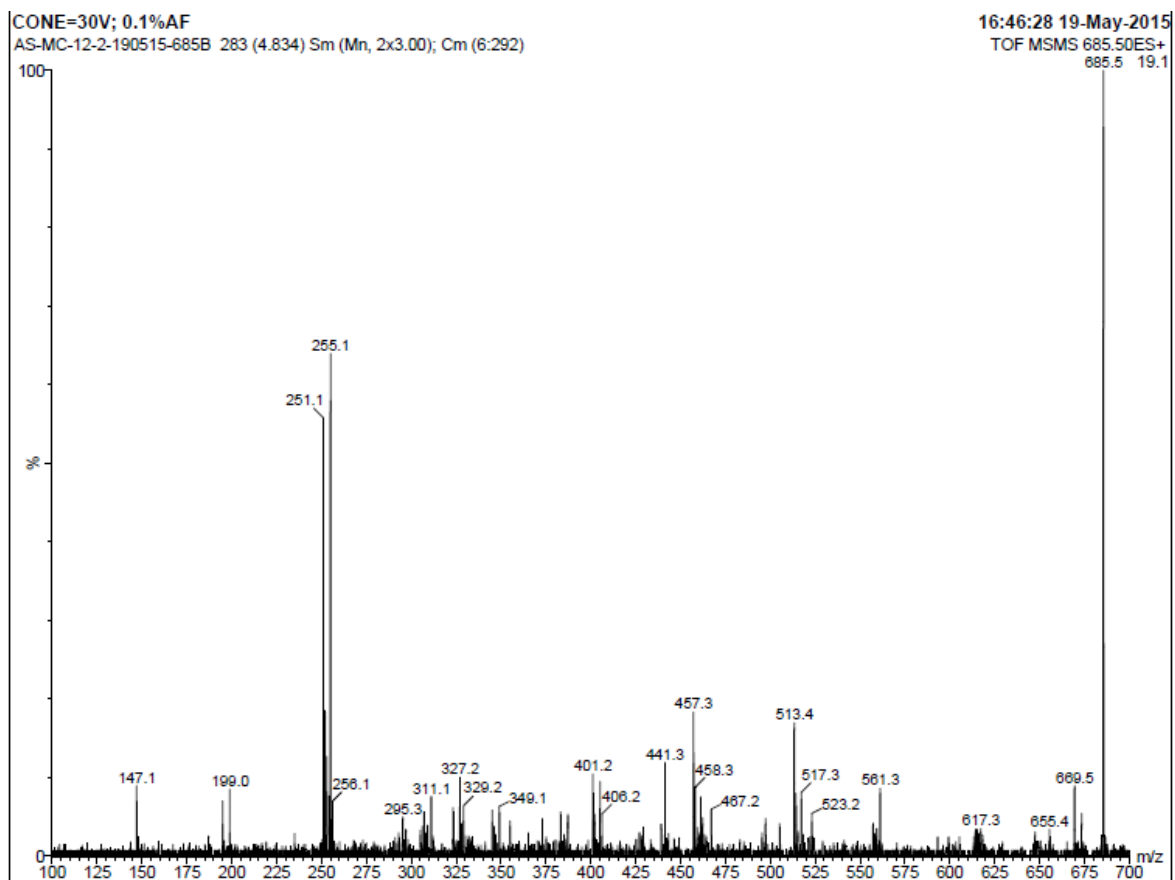

Fig. S14: MS-MS-ESI (+) spectrum of the peak  $m/z$  685 of the MS-ESI spectrum of the compound **1**



## Mass Spectrum Molecular Formula Report

Analysis Info  
Analysis Name AS12299372000001.d  
Sample Name VI-1

Electrospray (ESI)  
Acquisition Date 12/3/2012 12:37:43 PM  
Instrument micrOTOF

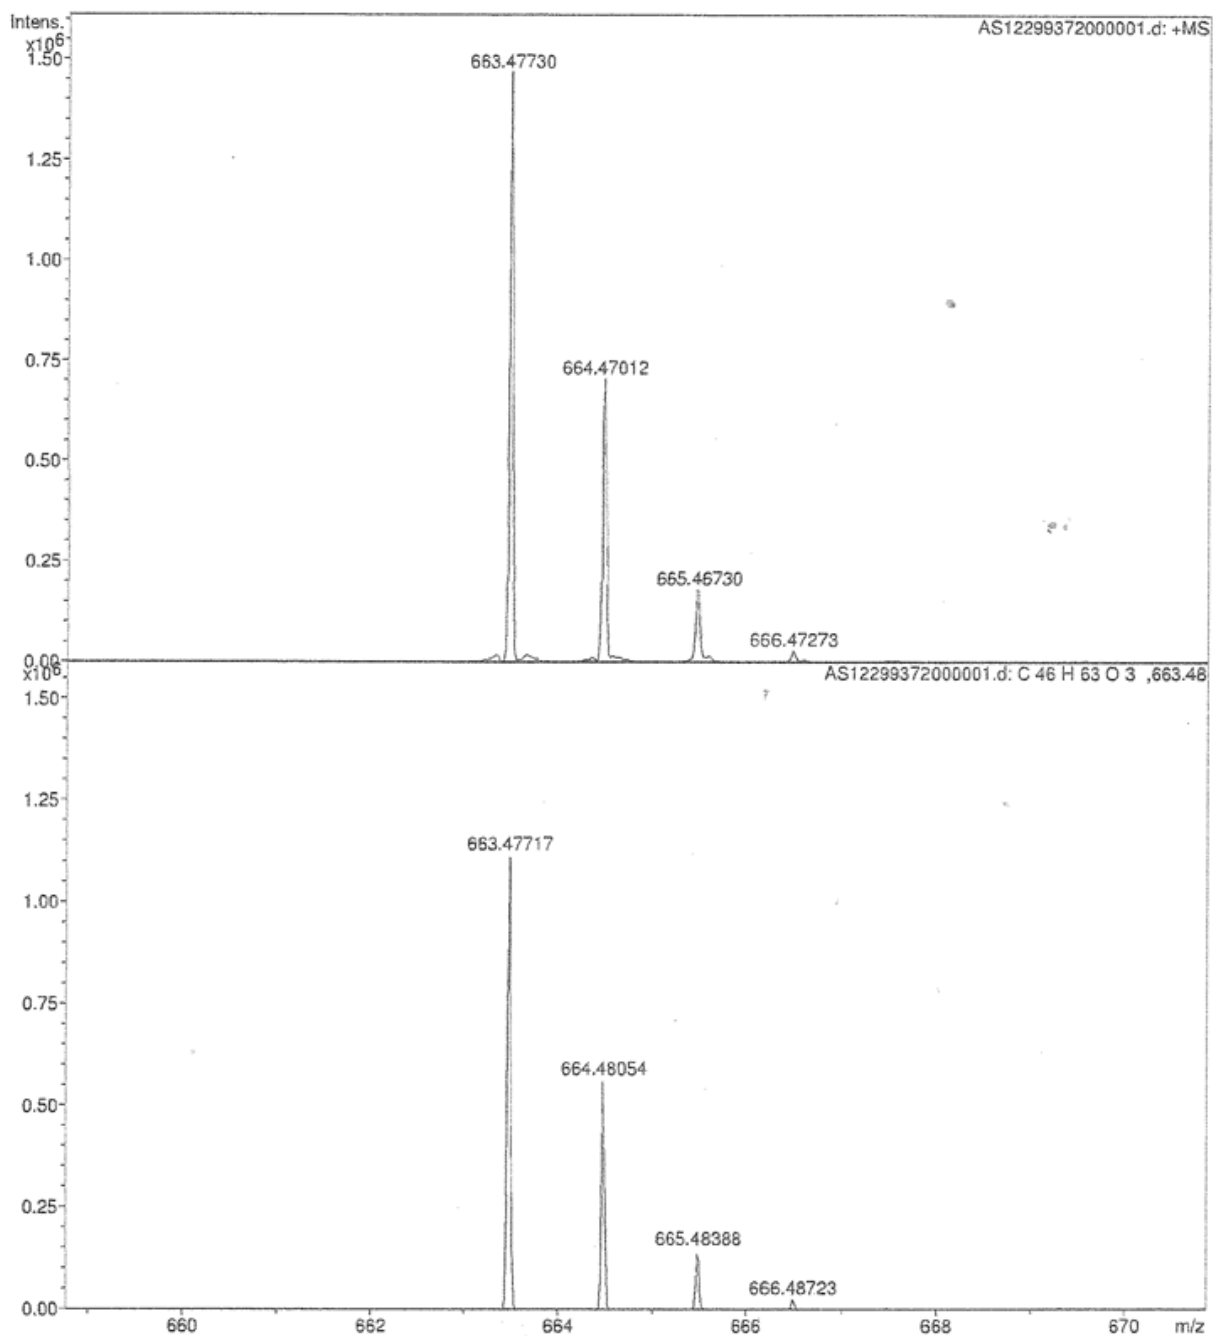

Fig. S15: HRMS spectrum of the compound 1.

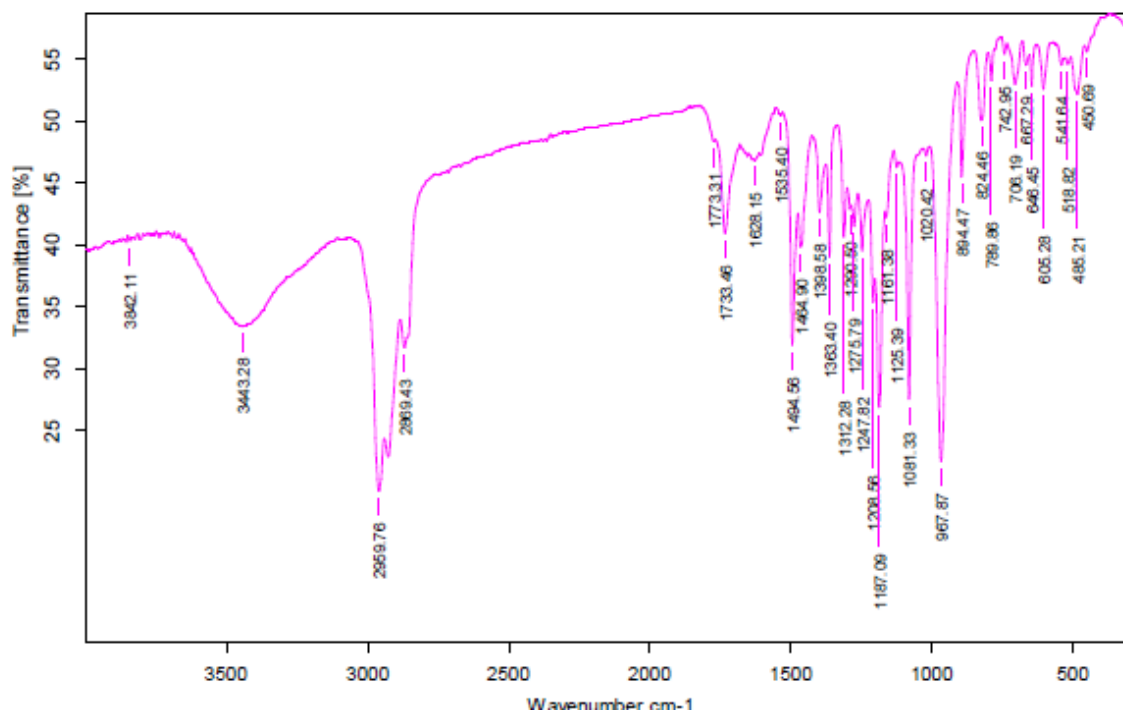

Fig. S16: FTIR spectrum of the compound 1.

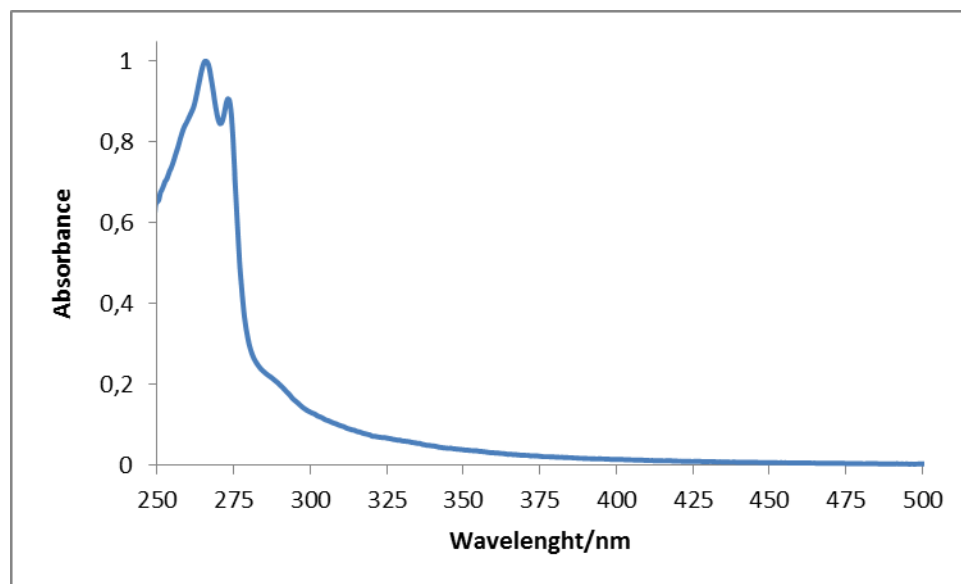

Fig. S17: Normalized UV-Vis spectrum of the compound1 in DMSO

## EXPERIMENTAL PROCEDURES

**General Experimental Procedures.** NMR spectra ( $^1\text{H}$ ,  $^{13}\text{C}$ , HSQC, HMBC [71 ms (7 Hz)], COSY) were measured in  $\text{CDCl}_3$ , on a Bruker Avance 500 with cryoprobe (Bruker, Wissembourg, France), operating at 500.13 MHz ( $^1\text{H}$ ) and 75.47 MHz ( $^{13}\text{C}$ ) and using TMS as internal standard. Chemical shifts were reported in  $\delta$  units (ppm) and coupling constants ( $J$ ) in Hz. The MS spectrum were obtained using ESI(+) with a Micromass Q-ToF 2<sup>TM</sup> mass spectrometer (Manchester, UK). The HRMS-ESI(+) were obtained using a MicroTof spectrometer with Apollo II (Bruker Daltonics, Bremen, Germany) with ESI interface, using a voltage of 4500 V applied to the needle, and a counter voltage between 100 and 150 V applied to the capillary. Column chromatography was performed with silica gel 60 (Aldrich Chemistry, 63-200  $\mu\text{m}$ ) and silica gel 60 (Acros Organics, 35-70  $\mu\text{m}$ ). Preparative thin layer chromatography was performed in glass plates (20 $\times$ 20 cm) precoated with Merck silica gel 60 GF<sub>254</sub> (0.5 mm thickness) and activated in a kiln at 100-110 $^\circ\text{C}$  for 12 hours. Merck silica gel 60 GF<sub>254</sub> plates were used for TLC. Spots were detected in TLC under UV light ( $\lambda$  254 and 366 nm).

**Plant Material.** The aerial parts of *Salicornia ramosissima* J. Woods were collected in Marina dos Puxadoiros (40 $^\circ$  39' 23'' N, 8 $^\circ$  40' 35'' W), Ria de Aveiro, Portugal. They were collected in vegetative state, from May to June, 2011 and identified by Helena Silva of the Department of Biology, University of Aveiro, Portugal. A voucher specimen (6606 AVE) was deposited in to the herbarium of the institution referred to above.

**Extraction and Isolation.** The air dried aerial parts of *Salicornia ramosissima* J. Wood (1087.6 g) were extracted with dichloromethane (2 $\times$ 5 L $\times$ 72h) at room temperature and filtered. The filtrate was evaporated *in vacuum* to obtain the  $\text{CH}_2\text{Cl}_2$  extract (18.1 g) which was chromatographed on a silica gel 60 (63-200  $\mu\text{m}$ ) column eluted with a gradient system composed

by Hex:CH<sub>2</sub>Cl<sub>2</sub> (1:9), CH<sub>2</sub>Cl<sub>2</sub>:EtOAc (1:0 and 3:7) and EtOAc:EtOH (1:1 and 0:1) yielding 10 fractions (A – J) some of them were chlorophylls. Fraction A (1.39 g) was applied to a silica gel 60 (35-70 μm) column eluted with Hex:CHCl<sub>3</sub> (from 100:0 to 0:100%) to yield 14 semi-purified fractions (A<sub>1</sub>–A<sub>14</sub>). Fraction A<sub>1</sub> (20 mg) was further purified by preparative thin layer chromatography [Hex:CH<sub>2</sub>Cl<sub>2</sub> (6:4)] to give pure saliramophenol (**1**) (6 mg).

**Saliramophenol (1)**: pale yellow oil; FTIR  $\nu_{\max}$  (KBr) cm<sup>-1</sup>: 3443 (O-H stretching), 2959 and 2869 (C–H stretching alkyl), 1398 and 1363 (C-H bending t-butyl) 1628 and 1535 (C=C stretching aromatic). <sup>1</sup>H NMR (CDCl<sub>3</sub>, 500 MHz): Table 1; <sup>13</sup>C NMR: (CDCl<sub>3</sub>, 75.47 MHz): Table 1; MS-ESI *m/z* 663 [M+H]<sup>+</sup>, 685 [M+Na]<sup>+</sup>; HREIMS *m/z* 663.4773 [M+H]<sup>+</sup> (calcd for C<sub>46</sub>H<sub>63</sub>O<sub>3</sub>, 663.4772).
